# Supplementary material for: FeCl2/MoS2/FeCl2 van der Waals junction for spintronic applications
Source: Royal Society of Chemistry journal article supplement (doi:10.1039/d0tc04156d), 2020-01-01
Supplement: d0tc04156d1.pdf [file d0tc04156d1.pdf]

## Supplementary Information for

### “FeCl<sub>2</sub>/MoS<sub>2</sub>/FeCl<sub>2</sub> van der Waals junction for spintronic applications”

Yulin Feng,<sup>a</sup> Xuming Wu,<sup>a</sup> Lei Hu<sup>a</sup> and Guoying Gao<sup>\*ab</sup>

<sup>a</sup>School of Physics, Huazhong University of Science and Technology, Wuhan 430074, China

<sup>b</sup>Wuhan National High Magnetic Field Center, Huazhong University of Science and Technology,  
Wuhan 430074, China

\*E-mail: guoying\_gao@mail.hust.edu.cn

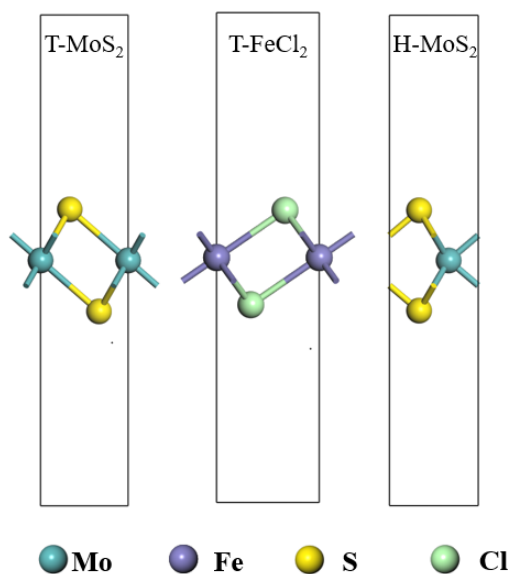

**Fig. S1** The side views of monolayer 1T-MoS<sub>2</sub>, 1T-FeCl<sub>2</sub> and 2H-MoS<sub>2</sub>.

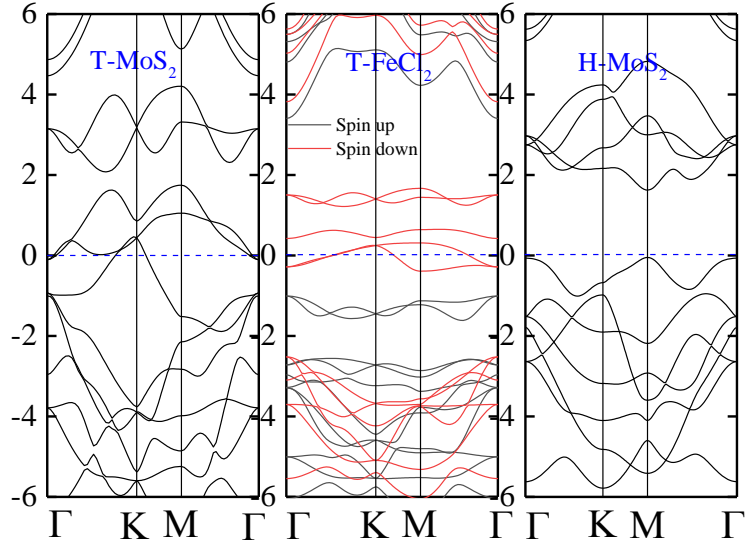

**Fig. S2** Spin-dependent band structures of monolayer 1T-MoS<sub>2</sub>, 1T-FeCl<sub>2</sub> and 2H-MoS<sub>2</sub>.

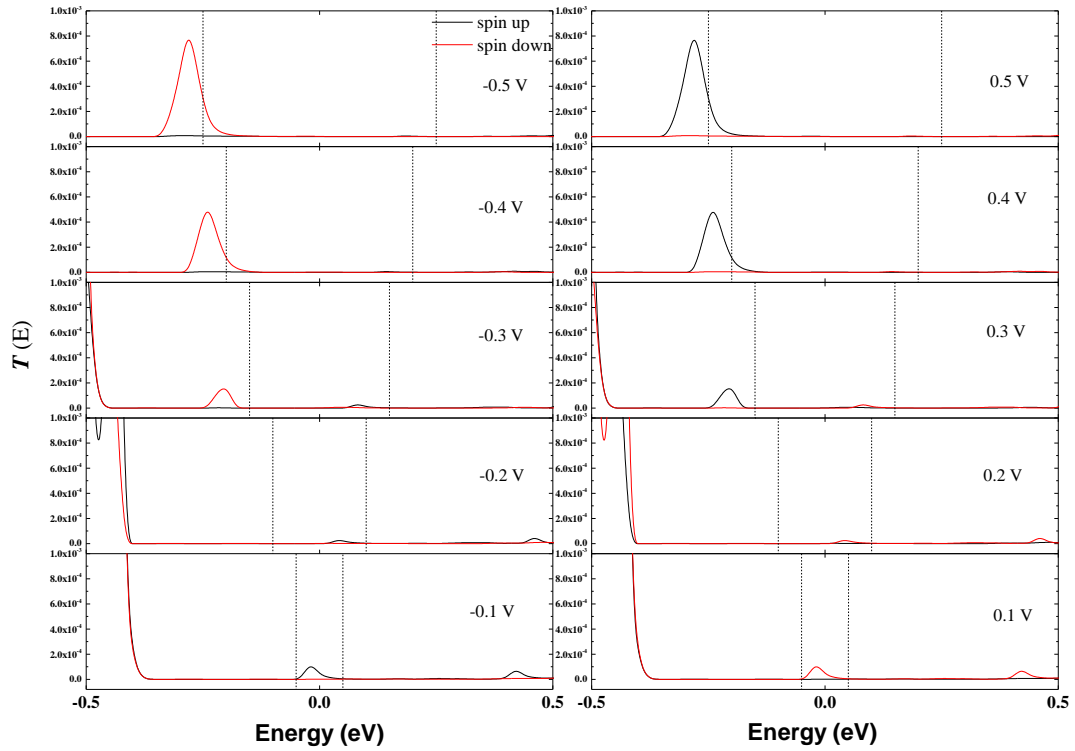

**Fig. S3** Spin-dependent transmission spectra within the applied bias voltages of  $\pm 0.1$ ,  $\pm 0.2$ ,  $\pm 0.3$ ,  $\pm 0.4$  and  $\pm 0.5$  V for the van der Waals magnetic tunnel junction of 1T-MoS<sub>2</sub>/1T-FeCl<sub>2</sub>/2H-MoS<sub>2</sub>/1T-FeCl<sub>2</sub>/1T-MoS<sub>2</sub> in the magnetic antiparallel configuration.

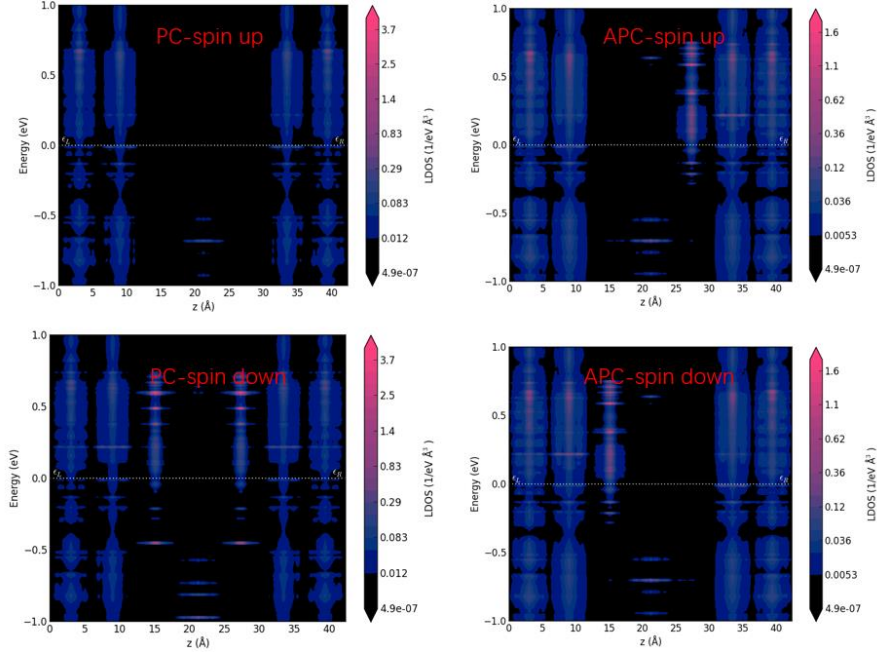

**Fig. S4** Spin-dependent local density of states of 1T-MoS<sub>2</sub>/1T-FeCl<sub>2</sub>/2H-MoS<sub>2</sub>/1T-FeCl<sub>2</sub>/1T-MoS<sub>2</sub> in magnetic parallel configuration (PC) and antiparallel configuration (APC) at zero bias voltage.

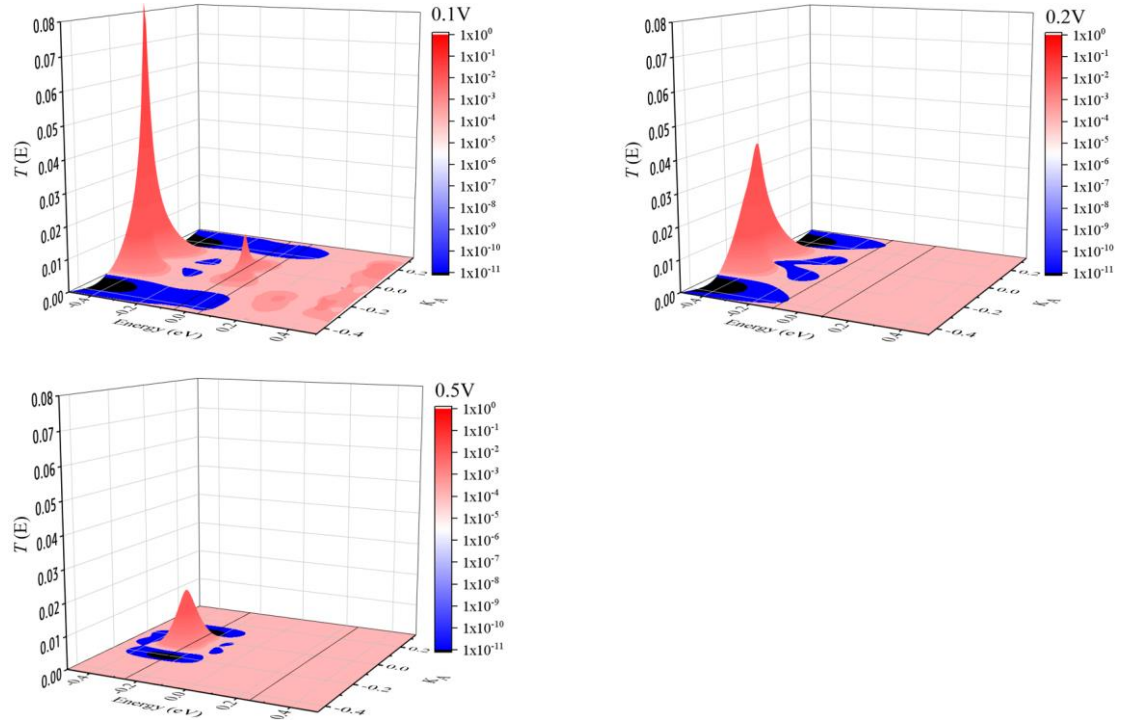

**Fig. S5** Spin-down transmission spectrum as a function of energy and momentum component  $k_A$  within the applied bias voltage  $V_b$  of 0.1, 0.2 and 0.5 V for the van der Waals magnetic tunnel junction in the magnetic parallel configuration. The two black lines represent the energy levels of  $-V_b/2$  and  $V_b/2$ , which are the boundary of bias window.
